# Supplementary material
Source: HighWire-hosted journal article supplement (https://bjsm.bmj.com/content/bjsports-2016-097355)
Supplement: inline-supplementary-material-6 [file inline-supplementary-material-6.pdf]

## **ONLINE SUPPLEMENTARY APPENDIX 6**

### **List of figures**

Figure 1. Meta-analysis of data for pain in the short term (0 to 6 weeks)

Figure 2. Meta-analysis of data for pain in the medium term (7 to 12 weeks)

Figure 3. Meta-analysis of data for pain in the longer term (13 to 52 weeks)

Figure 4. Meta-analysis of data for 'first step' pain in the medium term (7 to 12 weeks)

Figure 5. Meta-analysis of data for function in the medium term (7 to 12 weeks)

Figure 6. Meta-analysis of data for function in the longer term (13 to 52 weeks)

**Figure 1. Meta-analysis of data for pain in the short term (0 to 6 weeks)**

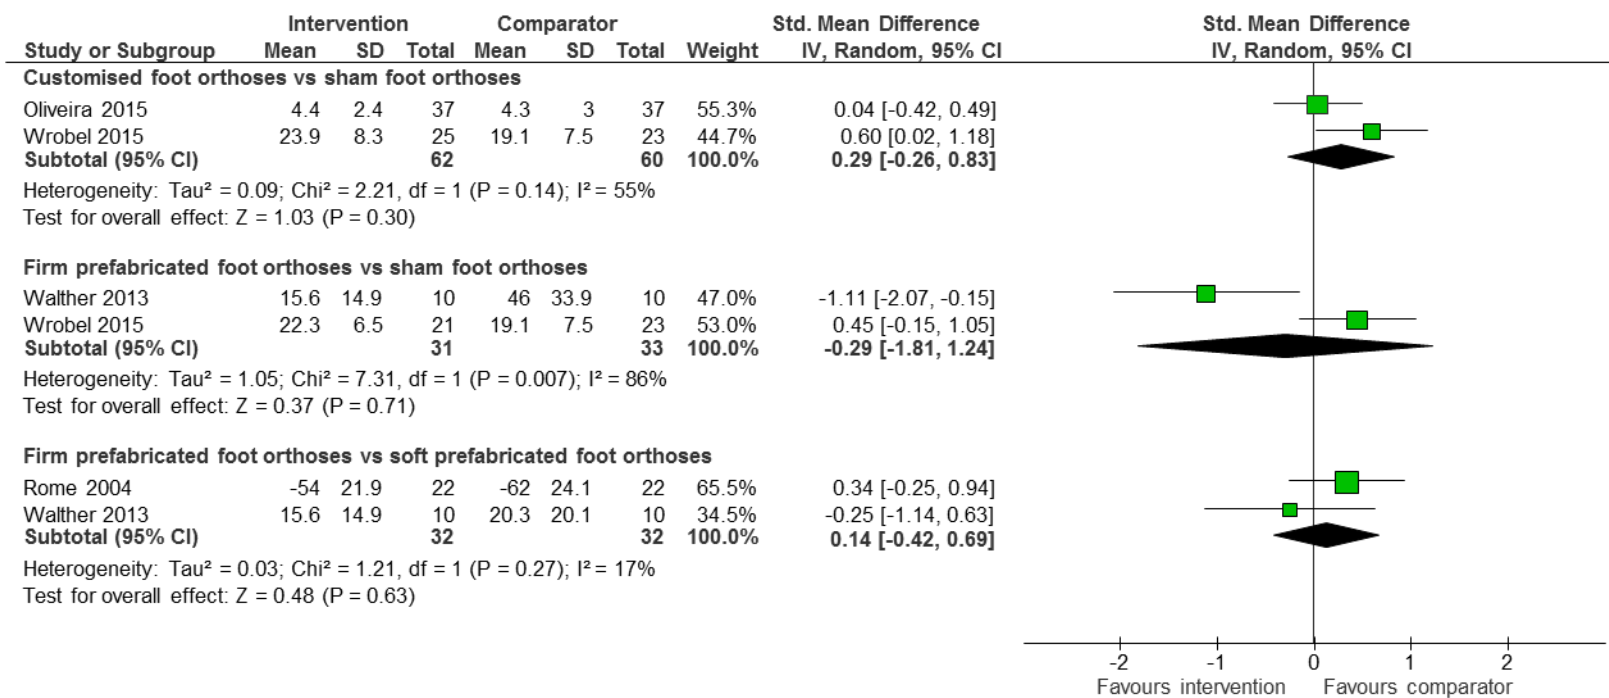

## Raw data

| Study ID                                                                    | Intervention |      |       | Comparator |      |       |
|-----------------------------------------------------------------------------|--------------|------|-------|------------|------|-------|
|                                                                             | Mean         | SD   | Total | Mean       | SD   | Total |
| <b>Customised foot orthoses vs sham foot orthoses</b>                       |              |      |       |            |      |       |
| Oliveira 2015                                                               | 4.4          | 2.4  | 37    | 4.3        | 3    | 37    |
| Wrobel 2015                                                                 | 23.9         | 8.3  | 25    | 19.1       | 7.5  | 23    |
| <b>Firm prefabricated foot orthoses vs sham foot orthoses</b>               |              |      |       |            |      |       |
| Walther 2013                                                                | 15.6         | 14.9 | 10    | 46         | 33.9 | 10    |
| Wrobel 2015                                                                 | 22.3         | 6.5  | 21    | 19.1       | 7.5  | 23    |
| <b>Firm prefabricated foot orthoses vs soft prefabricated foot orthoses</b> |              |      |       |            |      |       |
| Rome 2004                                                                   | -54          | 21.9 | 22    | -62        | 24.1 | 22    |
| Walther 2013                                                                | 15.6         | 14.9 | 10    | 20.3       | 20.1 | 10    |

**Figure 2. Meta-analysis of data for pain in the medium term (7 to 12 weeks)**

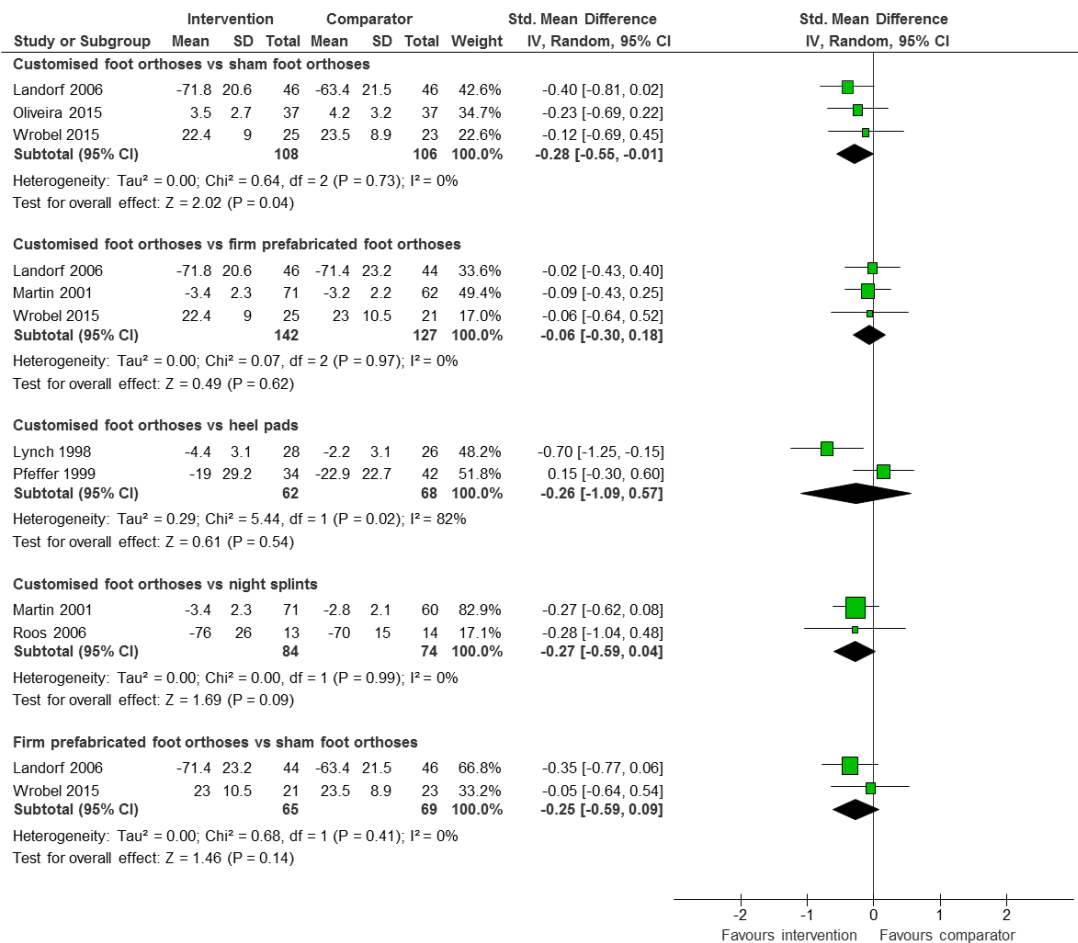

## Raw data

| Study ID                                                            | Intervention |      |       | Comparator |      |       |
|---------------------------------------------------------------------|--------------|------|-------|------------|------|-------|
|                                                                     | Mean         | SD   | Total | Mean       | SD   | Total |
| <b>Customised foot orthoses vs sham foot orthoses</b>               |              |      |       |            |      |       |
| Landorf 2006                                                        | -71.8        | 20.6 | 46    | -63.4      | 21.5 | 46    |
| Oliveira 2015                                                       | 3.5          | 2.7  | 37    | 4.2        | 3.2  | 37    |
| Wrobel 2015                                                         | 22.4         | 9    | 25    | 23.5       | 8.9  | 23    |
| <b>Customised foot orthoses vs firm prefabricated foot orthoses</b> |              |      |       |            |      |       |
| Landorf 2006                                                        | -71.8        | 20.6 | 46    | -71.4      | 23.2 | 44    |
| Martin 2001                                                         | -3.4         | 2.3  | 71    | -3.2       | 2.2  | 62    |
| Wrobel 2015                                                         | 22.4         | 9    | 25    | 23         | 10.5 | 21    |
| <b>Customised foot orthoses vs heel pads</b>                        |              |      |       |            |      |       |
| Lynch 1998                                                          | -4.4         | 3.1  | 28    | -2.2       | 3.1  | 26    |
| Pfeffer 1999                                                        | -19          | 29.2 | 34    | -22.9      | 22.7 | 42    |
| <b>Customised foot orthoses vs night splints</b>                    |              |      |       |            |      |       |
| Martin 2001                                                         | -3.4         | 2.3  | 71    | -2.8       | 2.1  | 60    |
| Roos 2006                                                           | -76          | 26   | 13    | -70        | 15   | 14    |
| <b>Firm prefabricated foot orthoses vs sham foot orthoses</b>       |              |      |       |            |      |       |
| Landorf 2006                                                        | -71.4        | 23.2 | 44    | -63.4      | 21.5 | 46    |
| Wrobel 2015                                                         | 23           | 10.5 | 21    | 23.5       | 8.9  | 23    |

**Figure 3. Meta-analysis of data for pain in the longer term (13 to 52 weeks)**

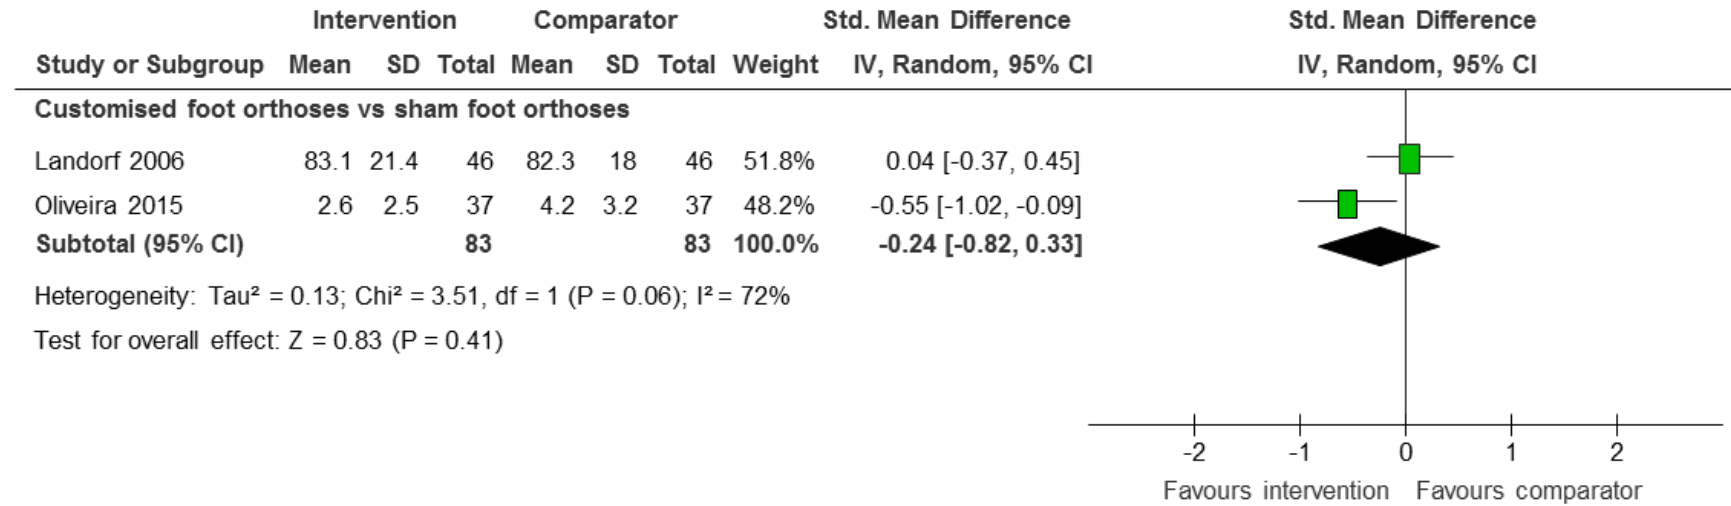

**Raw data**

| Study ID                                              | Intervention |      |       | Comparator |     |       |
|-------------------------------------------------------|--------------|------|-------|------------|-----|-------|
|                                                       | Mean         | SD   | Total | Mean       | SD  | Total |
| <b>Customised foot orthoses vs sham foot orthoses</b> |              |      |       |            |     |       |
| Landorf 2006                                          | 83.1         | 21.4 | 46    | 82.3       | 18  | 46    |
| Oliveira 2015                                         | 2.6          | 2.5  | 37    | 4.2        | 3.2 | 37    |

Figure 4. Meta-analysis of data for 'first step' pain in the medium term (7 to 12 weeks)

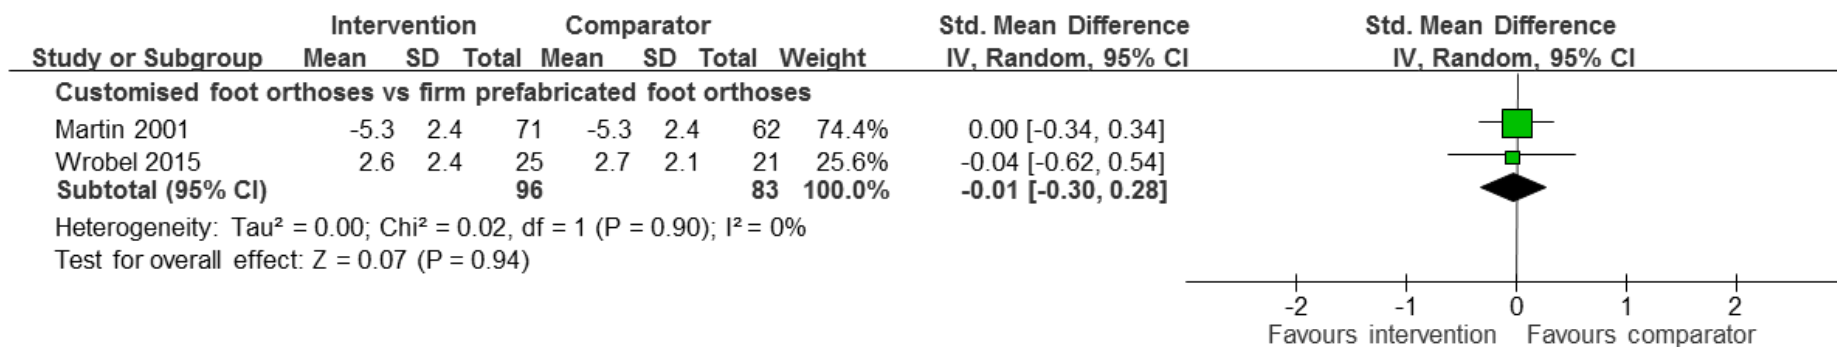

Raw data

| Study ID                                                            | Intervention |     |       | Comparator |     |       |
|---------------------------------------------------------------------|--------------|-----|-------|------------|-----|-------|
|                                                                     | Mean         | SD  | Total | Mean       | SD  | Total |
| <b>Customised foot orthoses vs firm prefabricated foot orthoses</b> |              |     |       |            |     |       |
| Martin 2001                                                         | -5.3         | 2.4 | 71    | -5.3       | 2.4 | 62    |
| Wrobel 2015                                                         | 2.6          | 2.4 | 25    | 2.7        | 2.1 | 21    |

**Figure 5. Meta-analysis of data for function in the medium term (7 to 12 weeks)**

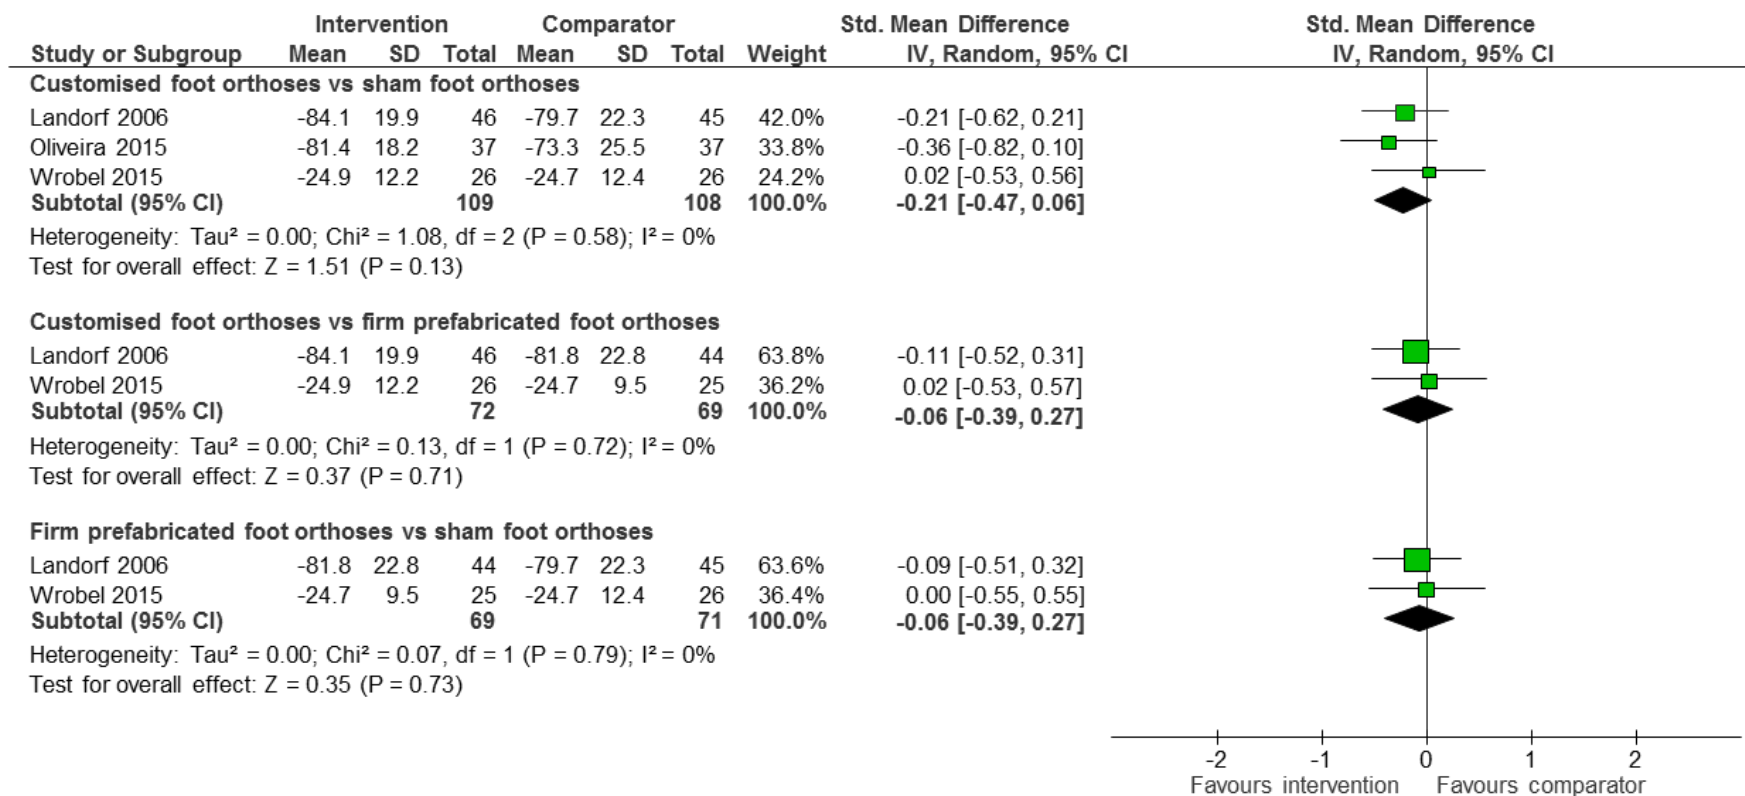



## Raw data

| Study ID                                                            | Intervention |      |       | Comparator |      |       |
|---------------------------------------------------------------------|--------------|------|-------|------------|------|-------|
|                                                                     | Mean         | SD   | Total | Mean       | SD   | Total |
| <b>Customised foot orthoses vs sham foot orthoses</b>               |              |      |       |            |      |       |
| Landorf 2006                                                        | -84.1        | 19.9 | 46    | -79.7      | 22.3 | 45    |
| Oliveira 2015                                                       | -81.4        | 18.2 | 37    | -73.3      | 25.5 | 37    |
| Wrobel 2015                                                         | 24.9         | 12.2 | 26    | 24.7       | 12.4 | 26    |
| <b>Customised foot orthoses vs firm prefabricated foot orthoses</b> |              |      |       |            |      |       |
| Landorf 2006                                                        | -84.1        | 19.9 | 46    | -81.8      | 22.8 | 44    |
| Wrobel 2015                                                         | 24.9         | 12.2 | 26    | 24.7       | 9.5  | 25    |
| <b>Firm prefabricated foot orthoses vs sham foot orthoses</b>       |              |      |       |            |      |       |
| Landorf 2006                                                        | -81.8        | 22.8 | 44    | -79.7      | 22.3 | 45    |
| Wrobel 2015                                                         | 24.7         | 9.5  | 25    | 24.7       | 12.4 | 26    |

**Figure 6. Meta-analysis of data for function in the longer term (13 to 52 weeks)**

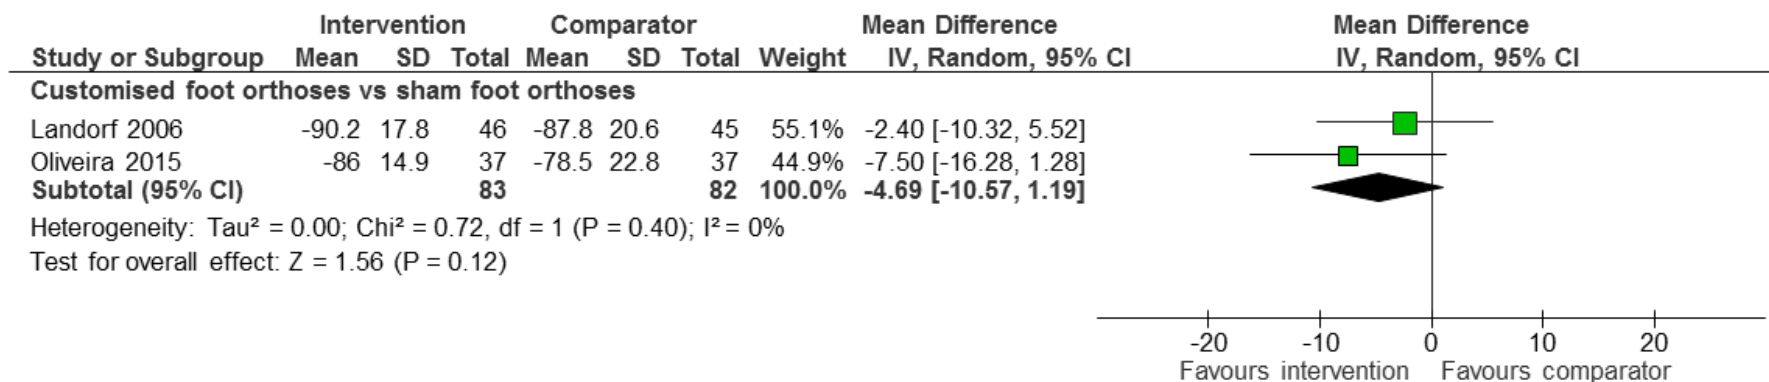

**Raw data**

| Study ID                                              | Intervention |      |       | Comparator |      |       |
|-------------------------------------------------------|--------------|------|-------|------------|------|-------|
|                                                       | Mean         | SD   | Total | Mean       | SD   | Total |
| <b>Customised foot orthoses vs sham foot orthoses</b> |              |      |       |            |      |       |
| Landorf 2006                                          | -90.2        | 17.8 | 46    | -87.8      | 20.6 | 45    |
| Oliveira 2015                                         | -86          | 14.9 | 37    | -78.5      | 22.8 | 37    |
